# Supplementary material for: Decoding hexanitrobenzene (HNB) and 1,3,5-triamino-2,4,6-trinitrobenzene (TATB) as two distinctive energetic nitrobenzene compounds by machine learning
Source: Royal Society of Chemistry journal article supplement (doi:10.1039/d2cp00439a), 2022-01-01
Supplement: d2cp00439a1.pdf [file d2cp00439a1.pdf]

# Encoding hexanitrobenzene (HNB) and 1,3,5-triamino-2,4,6-trinitrobenzene (TATB) as two distinctive energetic nitrobenzene compounds by machine learning

Rong Wang,<sup>†</sup> Jian Liu,<sup>†</sup> Xudong He,<sup>†</sup> Weiyu Xie,<sup>\*†</sup> and Chaoyang Zhang<sup>\*†,‡</sup>

<sup>†</sup> Institute of Chemical Materials, China Academy of Engineering Physics (CAEP), P. O. Box 919-311, Mianyang, Sichuan 621900, China.

<sup>‡</sup> Beijing Computational Science Research Center, Beijing 100048, China.

## Supplementary information

### Table of contents

**S1: HOF calculations for a solid.**

**S2: BDE calculations.**

**S3:  $v_D$  calculations.**

**S4: Oxygen balance (OB%) definition**

**S5: ML results of BDE**

**S6: Top molecules by  $\rho_{ML}$  and  $v_{DML}$ .**

**S7: Performance of ML in predicting BDE of C-NO<sub>2</sub> and N-NO<sub>2</sub>.**

**S8: References**

## S1: HOF calculations for a solid.

### (A) HOF calculations of gaseous molecules

As for the isodesmic reaction, one example of the isodesmic reaction for TATB (compound A) is illustrated in Figure S1. The heat of reaction  $\Delta H_{298}$  at 298 K was calculated on the level of B3LYP method/6-31g(d) with following eq 1:

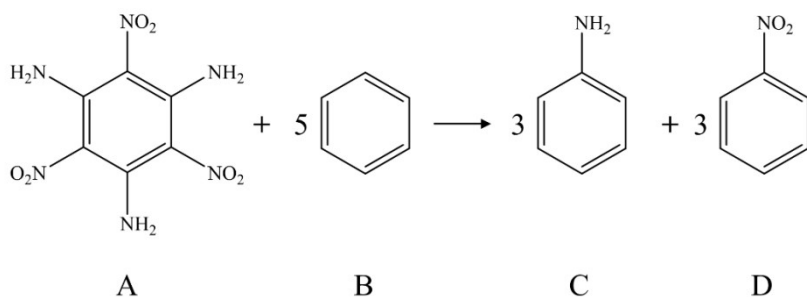

**Figure S1.** Isodesmic reaction designed for calculating HOF of TATB.

$$\Delta H_{298} = \Delta H_{f, P} - \Delta H_{f, R} \quad (1)$$

where  $\Delta H_{f, R}$  and  $\Delta H_{f, P}$  represent the HOFs of reactants and products at 298 K, respectively. For compounds in the isodesmic reactions with available data, they were directly adopted, as shown in Table S1.

**Table S1.** The HOFs of references compounds from CRC handbook. The unit of  $\Delta H_{f, \text{Exp}}^g$  is kJ/mol.

| Name          | Molecular structural formula       | $\Delta H_{f, \text{Exp}}^g$ |
|---------------|------------------------------------|------------------------------|
| Benzene       | PhH                                | 82.9                         |
| Nitrobenzene  | PhNO <sub>2</sub>                  | 68.5                         |
| Phenol        | PhOH                               | -96.4                        |
| Toluene       | PhCH <sub>3</sub>                  | 50.5                         |
| Benzoic acid  | PhCOOH                             | -294.0                       |
| Anisole       | PhOCH <sub>3</sub>                 | -67.9                        |
| Aniline       | PhNH <sub>2</sub>                  | 87.5                         |
| Acetophenone  | PhCOCH <sub>3</sub>                | -86.7                        |
| Benzaldehyde  | PhCHO                              | -36.7                        |
| Benzonitrile  | PhCN                               | 215.7                        |
| Benzamide     | PhCONH <sub>2</sub>                | -100.9                       |
| Ethoxybenzene | PhOCH <sub>2</sub> CH <sub>3</sub> | -101.6                       |
| Ethylbenzene  | PhCH <sub>2</sub> CH <sub>3</sub>  | 29.9                         |

For the compounds in the isodesmic reactions without available experimental HOFs, the atomization scheme was employed with calculations on the G3 level to predict their HOFs, as shown in Table S2. By means of the atomization scheme, the standard HOF of a molecule ( $\Delta H_f^g$ ) can be calculated by eq 2.

$$\Delta H_f^g = \Delta E_{298} + \Delta(PV) = \Delta E_0 + \Delta E_{ZPE} + \Delta E_T + \Delta nRT \quad (2)$$

where  $\Delta E_0$  means the change in total energy between the products and reactants at 0 K;  $\Delta E_{ZPE}$  is the value of difference between the zero-point energies of the products and reactants at 0 K;  $\Delta E_T$  is the thermal correction from 0 to 298 K. The  $\Delta(PV)$  value means the PV work term and equals  $\Delta nRT$  for the reactions of an ideal gas. For the isodesmic reaction in this work,  $\Delta n = 0$ , so  $\Delta(PV) = 0$ . From Table S2, we can confirmed that the largest error is only 6.9 kJ/mol, showing the high reliability of the G3 method.

**Table S2.**  $\Delta H_f^g$  of mono-substituted benzene molecules used for designing isodesmic reactions.  $\Delta H_{fExp}^g$  and  $\Delta H_{fG3}^g$  denote the  $\Delta H_f^g$  derived from experimental measurements and G3 calculations in kJ/mol, respectively.

| Functional group |                  |                    | Benzene based compound |                                    |                     |                    |       |
|------------------|------------------|--------------------|------------------------|------------------------------------|---------------------|--------------------|-------|
| Name             | Structure        | Symbol             | Name                   | Structure                          | $\Delta H_{fExp}^g$ | $\Delta H_{fG3}^g$ | Error |
| hydro            | H $\cdot$        | -H                 | benzene                | Ph-H                               | 82.9                | 87.3               | 4.4   |
| nitro            | $O_2\dot{N}^+$   | -NO <sub>2</sub>   | nitrobenzene           | Ph- $\overset{O}{\parallel}N^+$    | 68.5                | 63.4               | -5.1  |
| hydroxy          | $\dot{O}H$       | -OH                | phenol                 | Ph-OH                              | -96.4               | -89.5              | 6.9   |
| methoxy          | $O\dot{-}CH_3$   | -OCH <sub>3</sub>  | anisole                | Ph- $O-CH_3$                       | -67.9               | -69.3              | -1.4  |
| methyl           | $\dot{C}H_3$     | -CH <sub>3</sub>   | toluene                | Ph-CH <sub>3</sub>                 | 50.5                | 54.2               | 3.7   |
| carboxy          | $HO-C\dot{-}O$   | -COOH              | benzoic acid           | Ph- $\overset{O}{\parallel}C-OH$   | -294.0              | -294.3             | -0.3  |
| amino            | $\dot{N}H_2$     | -NH <sub>2</sub>   | aniline                | Ph-NH <sub>2</sub>                 | 87.5                | 92.2               | 4.7   |
| cyano            | $C\dot{-}N$      | -CN                | benzonitrile           | Ph- $\equiv N$                     | 215.7               | 218.6              | 2.9   |
| acetyl           | $H_3C-C\dot{-}O$ | -COCH <sub>3</sub> | acetophenone           | Ph- $\overset{O}{\parallel}C-CH_3$ | -86.7               | -81.5              | 5.2   |
| formyl           | $HC\dot{-}O$     | -CHO               | benzaldehyde           | Ph- $\overset{O}{\parallel}C-H$    | -36.7               | -34.9              | 1.8   |

|                      |  |                                      |                             |  |        |            |     |  |
|----------------------|--|--------------------------------------|-----------------------------|--|--------|------------|-----|--|
| acetylamino          |  | -NHC(=O)CH <sub>3</sub>              | <i>N</i> -phenylacetamide   |  |        | -105.0     |     |  |
| tert-butyl           |  | -C(CH <sub>3</sub> ) <sub>3</sub>    | tert-butylbenzene           |  | -23.0  | -22.8      | 0.2 |  |
| dimethylamino        |  | -N(CH <sub>3</sub> ) <sub>2</sub>    | <i>N,N</i> -dimethylaniline |  |        | 102.3      |     |  |
| carbamoyl            |  | -CONH <sub>2</sub>                   | benzamide                   |  | -100.9 | -94.5      | 6.4 |  |
| ethanoxy             |  | -OCH <sub>2</sub> CH <sub>3</sub>    | ethoxybenzene               |  | -101.6 | -99.8      | 1.8 |  |
| isopropyl            |  | -CH(CH <sub>3</sub> ) <sub>2</sub>   | <b>cumene</b>               |  |        | <b>4.9</b> |     |  |
| acetoxyl             |  | -OOCCH <sub>3</sub>                  | phenyl acetate              |  |        | -275.0     |     |  |
| hydroxymethyl        |  | -CH <sub>2</sub> OH                  | phenylmethanol              |  |        | -88.5      |     |  |
| carboxymethyl        |  | -CH <sub>2</sub> COOH                | phenylacetic acid           |  |        | -297.3     |     |  |
| (hydroxyimino)methyl |  | -CHNOH                               | benzaldehyde oxime          |  |        | 134.5      |     |  |
| hydrazinecarbonyl    |  | -CONHNH <sub>2</sub>                 | benzohydrazide              |  |        | 21.0       |     |  |
| methylamino          |  | -NHCH <sub>3</sub>                   | <i>N</i> -methylaniline     |  |        | 97.9       |     |  |
| ethyl                |  | -CH <sub>2</sub> CH <sub>3</sub>     | ethylbenzene                |  | 29.9   | 32.3       | 2.4 |  |
| formamino            |  | -NHCHO                               | <i>N</i> -phenylformamide   |  |        | -55.7      |     |  |
| prop-2-yn-1-oxy      |  | -OCH <sub>2</sub> C≡CH               | (prop-2-yn-1-yloxy)benzene  |  |        | 191.6      |     |  |
| isopropylamino       |  | -NHCH(CH <sub>3</sub> ) <sub>2</sub> | <i>N</i> -isopropylaniline  |  |        | 35.6       |     |  |
| ethynyl              |  | -C≡CH                                | ethynylbenzene              |  |        | 322.5      |     |  |
| methylcarbamoyl      |  | -CONHCH <sub>3</sub>                 | <i>N</i> -methylbenzamide   |  |        | -96.1      |     |  |

|                                  |  |                                                    |                                             |  |        |  |
|----------------------------------|--|----------------------------------------------------|---------------------------------------------|--|--------|--|
| <i>N'</i> -hydroxycarbami midoyl |  | -CNH <sub>2</sub> NOH                              | <i>N'</i> -hydroxybenzimidamide             |  | 114.0  |  |
| cyanomethoxy                     |  | -OCH <sub>2</sub> CN                               | phenoxyacetonitrile                         |  | 90.4   |  |
| cyanomethyl                      |  | -CH <sub>2</sub> CN                                | phenylacetonitrile                          |  | 201.3  |  |
| 1-(hydroxyimino)ethyl            |  | -CCH <sub>3</sub> NOH                              | 1-phenylethan-1-one oxime                   |  | 77.3   |  |
| methoxymethoxy                   |  | -OCH <sub>2</sub> OCH <sub>3</sub>                 | (methoxymethoxy) benzene                    |  | -225.7 |  |
| propionyl                        |  | -COCH <sub>2</sub> CH <sub>3</sub>                 | propiophenone                               |  | -103.7 |  |
| propylamino                      |  | -NHCH <sub>2</sub> CH <sub>2</sub> CH <sub>3</sub> | <i>N</i> -propylaniline                     |  | 48.2   |  |
| methyl(nitro)amino               |  | -NCH <sub>3</sub> NO <sub>2</sub>                  | <i>N</i> -methyl- <i>N</i> -phenylnitramide |  | 132.8  |  |
| azido                            |  | -NNN                                               | azidobenzene                                |  | 419.9  |  |
| 3-oxoprop-1-en-1-yl              |  | -CHCHCHO                                           | cinnamaldehyde                              |  | 27.9   |  |
| 2-hydroxypropan-2-yl             |  | -COH(CH <sub>3</sub> ) <sub>2</sub>                | 2-phenylpropan-2-ol                         |  | -170.9 |  |
| prop-1-en-1-yl                   |  | -CHCHCH <sub>3</sub>                               | prop-1-en-1-ylbenzene                       |  | 120.8  |  |

### (B) HOF calculations for a solid

As most energetic compounds are in the solid state, the calculation of detonation properties requires solid-phase heat of formation ( $\Delta H_f^s$ ). According to Hess's law of constant heat summation, the solid-phase heat of formation can be acquired from the gas-phase heat of formation ( $\Delta H_f^g$ ) and heat of sublimation ( $\Delta H_{sub}$ ):

$$\Delta H_f^s = \Delta H_f^g - \Delta H_{sub}$$

As for the heat of sublimation, Politzer et al.<sup>3</sup> reported that it correlates with the molecular surface

area and the electrostatic interaction  $v\sigma_{tot}^2$  index for energetic compounds. The empirical expression of this approach is as follows:

$$\Delta H_{sub} = aA^2 + b(v\sigma_{tot}^2)^{0.5} + c$$

where  $A$  represents the surface area of the 0.001 electrons bohr<sup>-3</sup> isosurface of the electronic density of the molecule,  $v$  describes the degree of balance between positive potential and negative potential on the isosurface, and  $\sigma_{tot}^2$  means a measure of the variability of the electrostatic potential on the molecular surface. The coefficients  $a$ ,  $b$ , and  $c$  have been obtained by Rice et al. for the energetic materials:  $a = 2.670 \times 10^{-4}$  kcal mol<sup>-1</sup> Å<sup>-4</sup>,  $b = 1650$  kcal mol<sup>-1</sup>, and  $c = 2.966$  kcal mol<sup>-1</sup>.<sup>4</sup> The descriptors  $A$ ,  $v$  and  $\sigma_{tot}^2$  were calculated using the Multiwfn program.<sup>5</sup>

## S2: BDE calculations.

**Table S3.** The calculated BDE (in kJ/mol) of forty mono-substituted benzene molecules.  $BDE_{G3}$  and  $BDE_{b3lyp}$  denote BDE calculated by B3LYP/6-31g(d)+D3 and G3 methods, respectively.

| Name                        | Structure                                                                           | BDE reaction                                                                 | $BDE_{G3}$   | $BDE_{b3lyp}$ | Error        |
|-----------------------------|-------------------------------------------------------------------------------------|------------------------------------------------------------------------------|--------------|---------------|--------------|
| benzene                     | Ph-H                                                                                | Ph → Ph• + •H                                                                | 472.6        | 458.9         | -2.9%        |
| nitrobenzene                | 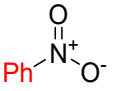   | PhNO <sub>2</sub> → Ph• + •NO <sub>2</sub>                                   | 316.0        | 300.0         | -5.1%        |
| phenol                      | Ph-OH                                                                               | PhOH → Ph• + •OH                                                             | 467.8        | 455.7         | -2.6%        |
| anisole                     | Ph-O-CH <sub>3</sub>                                                                | PhOCH <sub>3</sub> → Ph• + •OCH <sub>3</sub>                                 | 435.1        | 406.2         | -6.6%        |
|                             |                                                                                     | PhOCH <sub>3</sub> → PhO• + •CH <sub>3</sub>                                 | 266.0        | 253.6         | -4.7%        |
| toluene                     | Ph-CH <sub>3</sub>                                                                  | PhCH <sub>3</sub> → Ph• + •CH <sub>3</sub>                                   | 430.4        | 418.9         | -2.7%        |
| benzoic acid                |    | PhCOOH → Ph• + •COOH                                                         | 463.7        | 445.7         | -3.9%        |
| aniline                     | Ph-NH <sub>2</sub>                                                                  | PhNH <sub>2</sub> → Ph• + •NH <sub>2</sub>                                   | 436.2        | 419.8         | -3.8%        |
| benzonitrile                | Ph-C≡N                                                                              | PhCN → Ph• + •CN                                                             | 572.3        | 564.2         | -1.4%        |
| acetophenone                |   | <b>PhCOCH<sub>3</sub> → Ph• + •COCH<sub>3</sub></b>                          | <b>416.5</b> | <b>401.3</b>  | <b>-3.6%</b> |
|                             |                                                                                     | PhCOCH <sub>3</sub> → PhCO• + •CH <sub>3</sub>                               | 346.0        | 341.2         | -1.4%        |
| benzaldehyde                | Ph-CHO                                                                              | PhCHO → Ph• + •CHO                                                           | 419.8        | 409.6         | -2.4%        |
| <i>N</i> -phenylacetamide   |  | PhNHCOCH <sub>3</sub> → Ph• + •NHCOCH <sub>3</sub>                           | 469.7        | 442.6         | -5.8%        |
|                             |                                                                                     | PhNHCOCH <sub>3</sub> → PhNH• + •COCH <sub>3</sub>                           | 351.2        | 352.0         | -2.0%        |
|                             |                                                                                     | PhNHCOCH <sub>3</sub> → PhNHCO• + •CH <sub>3</sub>                           | 359.0        | 336.3         | -4.2%        |
| tert-butylbenzene           |  | PhC(CH <sub>3</sub> ) <sub>3</sub> → Ph• + •C(CH <sub>3</sub> ) <sub>3</sub> | 422.0        | 380.1         | -9.9%        |
| <i>N,N</i> -dimethylaniline |  | PhN(CH <sub>3</sub> ) <sub>2</sub> → Ph• + •N(CH <sub>3</sub> ) <sub>2</sub> | 404.4        | 372.4         | -7.9%        |
| benzamide                   |  | PhCONH <sub>2</sub> → Ph• + •CONH <sub>2</sub>                               | 427.6        | 407.6         | -4.7%        |
|                             |                                                                                     | PhCONH <sub>2</sub> → PhCO• + •NH <sub>2</sub>                               | 403.0        | 392.9         | -2.5%        |
| ethoxybenzene               | Ph-O-CH <sub>2</sub> -CH <sub>3</sub>                                               | PhOCH <sub>2</sub> CH <sub>3</sub> → Ph• + •OCH <sub>2</sub> CH <sub>3</sub> | 432.6        | 402.0         | -7.1%        |
|                             |                                                                                     | PhOCH <sub>2</sub> CH <sub>3</sub> → PhO• + •CH <sub>2</sub> CH <sub>3</sub> | 276.7        | 255.5         | -7.6%        |

|                                 |                                                                                     |                                                                                             |              |              |              |
|---------------------------------|-------------------------------------------------------------------------------------|---------------------------------------------------------------------------------------------|--------------|--------------|--------------|
| cumene                          | 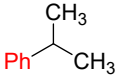   | $\text{PhCH}(\text{CH}_3)_2 \rightarrow \text{Ph}\cdot + \cdot\text{CH}(\text{CH}_3)_2$     | 429.8        | 398.7        | -7.2%        |
| phenyl acetate                  |    | $\text{PhOOCCH}_3 \rightarrow \text{Ph}\cdot + \cdot\text{OOCCH}_3$                         | 447.0        | 396.9        | -11.2%       |
| phenylmethanol                  |    | $\text{PhCH}_2\text{OH} \rightarrow \text{Ph}\cdot + \cdot\text{CH}_2\text{OH}$             | 417.3        | 402.9        | -3.5%        |
| phenylacetic acid               |    | $\text{PhCH}_2\text{COOH} \rightarrow \text{Ph}\cdot + \cdot\text{CH}_2\text{COOH}$         | 428.1        | 405.8        | -5.2%        |
|                                 |                                                                                     | $\text{PhCH}_2\text{COOH} \rightarrow \text{PhCH}_2\cdot + \cdot\text{COOH}$                | 333.2        | 310.4        | -6.8%        |
| benzaldehyde oxime              |    | $\text{PhCHNOH} \rightarrow \text{Ph}\cdot + \cdot\text{CHNOH}$                             | 491.8        | 461.8        | -6.1%        |
|                                 |                                                                                     | $\text{PhCHNOH} \rightarrow \text{PhCHN}\cdot + \cdot\text{OH}$                             | 246.4        | 222.7        | -9.6%        |
| benzohydrazide                  |    | $\text{PhCONHNH}_2 \rightarrow \text{Ph}\cdot + \cdot\text{CONHNH}_2$                       | 435.1        | 413.2        | -5.0%        |
|                                 |                                                                                     | $\text{PhCONHNH}_2 \rightarrow \text{PhCONH}\cdot + \cdot\text{NH}_2$                       | 310.0        | 294.5        | -5.0%        |
| <i>N</i> -methylaniline         |   | $\text{PhNHCH}_3 \rightarrow \text{Ph}\cdot + \cdot\text{NHCH}_3$                           | <b>426.6</b> | <b>401.9</b> | <b>-5.8%</b> |
|                                 |                                                                                     | $\text{PhNHCH}_3 \rightarrow \text{PhNH}\cdot + \cdot\text{CH}_3$                           | 296.4        | 285.3        | -3.8%        |
| ethylbenzene                    |  | $\text{PhCH}_2\text{CH}_3 \rightarrow \text{Ph}\cdot + \cdot\text{CH}_2\text{CH}_3$         | 431.6        | 405.6        | -6.0%        |
| <i>N</i> -phenylformamide       |  | $\text{PhNHCHO} \rightarrow \text{Ph}\cdot + \cdot\text{NHCHO}$                             | 475.4        | 449.2        | -5.5%        |
| (prop-2-yn-1-yloxy)benzene      |  | $\text{PhOCH}_2\text{CCH} \rightarrow \text{Ph}\cdot + \cdot\text{OCH}_2\text{CCH}$         | 434.9        | 403.5        | -7.2%        |
|                                 |                                                                                     | $\text{PhOCH}_2\text{CCH} \rightarrow \text{PhO}\cdot + \cdot\text{CH}_2\text{CCH}$         | 215.7        | 184.4        | -14.5%       |
| <i>N</i> -isopropylaniline      |  | $\text{PhNHCH}(\text{CH}_3)_2 \rightarrow \text{Ph}\cdot + \cdot\text{NHCH}(\text{CH}_3)_2$ | 431.8        | 405.5        | -6.1%        |
|                                 |                                                                                     | $\text{PhNHCH}(\text{CH}_3)_2 \rightarrow \text{PhNH}\cdot + \cdot\text{CH}(\text{CH}_3)_2$ | 309.5        | 280.4        | -9.4%        |
| ethynylbenzene                  |  | $\text{PhCCH} \rightarrow \text{Ph}\cdot + \cdot\text{CCH}$                                 | 591.8        | 581.6        | -1.7%        |
| <i>N</i> -methylbenzamide       |  | $\text{PhCONHCH}_3 \rightarrow \text{Ph}\cdot + \cdot\text{CONHCH}_3$                       | 432.4        | 410.1        | -5.2%        |
|                                 |                                                                                     | $\text{PhCONHCH}_3 \rightarrow \text{PhCO}\cdot + \cdot\text{NHCH}_3$                       | 401.5        | 382.1        | -4.8%        |
| <i>N'</i> -hydroxybenzimidamide |  | $\text{PhCNH}_2\text{NOH} \rightarrow \text{Ph}\cdot + \cdot\text{CNH}_2\text{NOH}$         | 470.6        | 444.8        | -5.5%        |
| phenoxyacetonitrile             |  | $\text{PhOCH}_2\text{CN} \rightarrow \text{Ph}\cdot + \cdot\text{OCH}_2\text{CN}$           | 436.5        | 405.1        | -7.2%        |



|                                             |  |                                                                                                               |              |              |              |
|---------------------------------------------|--|---------------------------------------------------------------------------------------------------------------|--------------|--------------|--------------|
| 1-phenylethan-1-one oxime                   |  | $\text{PhCH}_2\text{CN} \rightarrow \text{Ph}\cdot + \cdot\text{CH}_2\text{CN}$                               | 402.2        | 371.6        | -7.6%        |
| 1-phenylethan-1-one oxime                   |  | $\text{PhCCH}_3\text{NOH} \rightarrow \text{Ph}\cdot + \cdot\text{CCH}_3\text{NOH}$                           | 475.1        | 445.7        | -6.2%        |
| (methoxymethoxy)benzene                     |  | $\text{PhOCH}_2\text{OCH}_3 \rightarrow \text{Ph}\cdot + \cdot\text{OCH}_2\text{OCH}_3$                       | 425.2        | 389.9        | -8.3%        |
|                                             |  | $\text{PhOCH}_2\text{OCH}_3 \rightarrow \text{PhOCH}_2\cdot + \cdot\text{OCH}_3$                              | 365.5        | 339.5        | -7.1%        |
|                                             |  | $\text{PhOCH}_2\text{OCH}_3 \rightarrow \text{PhOCH}_2\text{O}\cdot + \cdot\text{CH}_3$                       | 343.2        | 324.9        | -5.3%        |
| propiophenone                               |  | $\text{PhCOCH}_2\text{CH}_3 \rightarrow \text{Ph}\cdot + \cdot\text{COCH}_2\text{CH}_3$                       | 418.5        | 401.8        | -4.0%        |
|                                             |  | $\text{PhCOCH}_2\text{CH}_3 \rightarrow \text{PhCO}\cdot + \cdot\text{CH}_2\text{CH}_3$                       | 348.1        | 335.1        | -3.7%        |
| <i>N</i> -propylaniline                     |  | $\text{PhNHCH}_2\text{CH}_2\text{CH}_3 \rightarrow \text{Ph}\cdot + \cdot\text{NHCH}_2\text{CH}_2\text{CH}_3$ | 431.8        | 404.8        | -6.3%        |
| <i>N</i> -propylaniline                     |  | $\text{PhNHCH}_2\text{CH}_2\text{CH}_3 \rightarrow \text{PhNH}\cdot + \cdot\text{CH}_2\text{CH}_2\text{CH}_3$ | <b>309.8</b> | <b>288.4</b> | <b>-6.9%</b> |
| <i>N</i> -methyl- <i>N</i> -phenylnitramide |  | $\text{PhNCH}_3\text{NO}_2 \rightarrow \text{Ph}\cdot + \cdot\text{NCH}_3\text{NO}_2$                         | 416.9        | 391.4        | -6.1%        |
|                                             |  | $\text{PhNCH}_3\text{NO}_2 \rightarrow \text{PhNCH}_3\cdot + \cdot\text{NO}_2$                                | 153.7        | 134.9        | -12.2%       |
|                                             |  | $\text{PhNCH}_3\text{NO}_2 \rightarrow \text{PhNNO}_2\cdot + \cdot\text{CH}_3$                                | 294.1        | 285.3        | -3.0%        |
| azidobenzene                                |  | $\text{PhNNN} \rightarrow \text{Ph}\cdot + \cdot\text{NNN}(\cdot\text{N}_3)$                                  | 379.1        | 356.2        | -6.0%        |
|                                             |  | $\text{PhNNN} \rightarrow \text{PhN}\cdot + \cdot\text{N}_2$                                                  | -0.7         | 5.2          | -797.8%      |
| cinnamaldehyde                              |  | $\text{PhCHCHCHO} \rightarrow \text{Ph}\cdot + \cdot\text{CHCHCHO}$                                           | 503.9        | 489.8        | -2.8%        |
| 2-phenylpropan-2-ol                         |  | $\text{PhCOH}(\text{CH}_3)_2 \rightarrow \text{Ph}\cdot + \cdot\text{COH}(\text{CH}_3)_2$                     | 419.6        | 386.6        | -7.8%        |
| prop-1-en-1-ylbenzene                       |  | $\text{PhCHCHCH}_3 \rightarrow \text{Ph}\cdot + \cdot\text{CHCHCH}_3$                                         | 493.6        | 480.9        | -2.6%        |

### S3: $v_D$ calculations.

#### 1. Kamlet–Jacobs equations<sup>2</sup>:

$$p = 1.558\rho_0^2\varphi$$

$$v_D = 1.01\varphi^{\frac{1}{2}}(1 + 1.30\rho_0)$$

$$\varphi = 0.489N\bar{M}^{\frac{1}{2}}Q^{\frac{1}{2}}$$

where  $p$  is the C-J denotation pressure, in unit of GPa;  $v_D$  is the denotation velocity, in unit of km/s;  $\rho_0$  is the density of EMs, in unit of g/cm<sup>3</sup>;  $N$  is the amount of generated gaseous products per gram EMs, in unit of mol/g;  $\bar{M}$  is the mean molar mass of gaseous products, in unit of g/mol;  $Q$  is the denotation heat of EMs, in unit of J/g.

For EMs of c.f.  $C_aH_bO_cN_d$ :

(1) When  $c \geq 2a + \frac{b}{2}$ , the reaction equation is:

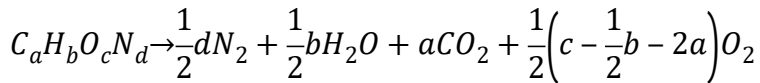

The mean molar mass of the EM is:

$$M = 12a + b + 16c + 14d$$

$N$ ,  $\bar{M}$  and  $Q$  are:

$$N = \frac{1}{4M}(b + 2c + 2d)$$

$$\bar{M} = \frac{28d + 18b + 88a + 16(2c - b - 4a)}{d + b + 2a + \left(c - \frac{1}{2}b - 2a\right)} = \frac{24a + 2b + 32c + 28d}{\frac{1}{2}b + c + d} = \frac{4M}{b + 2c + 2d}$$

$$Q = \frac{28.9b + 94.1a - 0.239\Delta H_f^0}{M} \times 4.184 \times 10^3$$

where  $\Delta H_f^0$  is the standard formation enthalpy of the EM;  $\Delta H_f^0[N_2(g)] = 0$ ,  $\Delta H_f^0[H_2O(g)] = 57.8 \text{ kcal/mol}$ ,  $\Delta H_f^0[CO_2(g)] = 94.1 \text{ kcal/mol}$ ,  $\Delta H_f^0[O_2(g)] = 0 \text{ kcal/mol}$ ,  $\Delta H_f^0[C(s)] = 0 \text{ kcal/mol}$ .

(2) When  $2a + \frac{b}{2} > c \geq \frac{b}{2}$ , the reaction equation is:

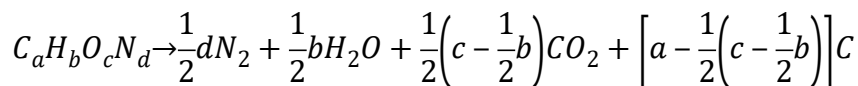

$N$ ,  $\bar{M}$  and  $Q$  are:

$$N = \frac{1}{4M}(b + 2c + 2d)$$

$$\bar{M} = \frac{56d + 88c - 8b}{b + 2c + 2d}$$

$$Q = \frac{28.9b + 94.1\left(\frac{c}{2} - \frac{b}{4}\right) - 0.239\Delta H_f^0}{M} \times 4.184 \times 10^3$$

(3) When  $\frac{b}{2} > c$ , the reaction equation is:

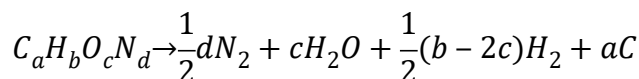

$N$ ,  $\bar{M}$  and  $Q$  are:

$$N = \frac{1}{2M}(b + d)$$

$$\bar{M} = \frac{2b + 32c + 28d}{b + d}$$

$$Q = \frac{57.8c - 0.239\Delta H_f^0}{M} \times 4.184 \times 10^3$$

#### S4: Oxygen balance (OB%) definition

For EMs in c.f.  $C_aH_bO_cN_d$ :

$$OB\% = \frac{c - \frac{1}{2}b - 2a}{c} \times 100\%$$

#### S5: ML results of BDE

**Table S4.** Test scores of the ML models of BDE. The results of the best models are highlighted in bold.

|                                        |      | Ridge | Lasso | SVR   | RFR   | GBR   | MLP          | Ensemble | GRU   |
|----------------------------------------|------|-------|-------|-------|-------|-------|--------------|----------|-------|
| <b>BDE</b> <sub>C-NO<sub>2</sub></sub> | RMSE | 11.60 | 11.42 | 10.96 | 11.89 | 11.37 | <b>10.60</b> | 10.77    | 11.09 |
| (kJ·mol <sup>-1</sup> )                | MAE  | 8.73  | 8.62  | 8.11  | 9.00  | 8.55  | <b>8.02</b>  | 8.05     | 8.01  |

|                                                       |                |       |              |       |       |       |              |       |       |
|-------------------------------------------------------|----------------|-------|--------------|-------|-------|-------|--------------|-------|-------|
|                                                       | R <sup>2</sup> | 0.730 | 0.738        | 0.759 | 0.716 | 0.741 | <b>0.775</b> | 0.767 | 0.753 |
| <b>BDE<sub>N-NO2</sub></b><br>(kJ·mol <sup>-1</sup> ) | RMSE           | 13.64 | <b>13.4</b>  | 13.91 | 13.68 | 13.71 | 13.97        | 13.51 | 13.71 |
|                                                       | MAE            | 10.72 | <b>10.61</b> | 10.89 | 10.81 | 10.81 | 10.92        | 10.64 | 10.85 |
|                                                       | R <sup>2</sup> | 0.258 | <b>0.276</b> | 0.229 | 0.254 | 0.251 | 0.223        | 0.272 | 0.251 |

### S6: Top molecules by $\rho_{ML}$ and $\nu_{DML}$ .

**Table S5.** Top 30 Molecules by  $\rho_{ML}$ .  $\rho_{ML}$  and  $\nu_{DML}$  are in  $\text{g cm}^{-3}$  and  $\text{m s}^{-1}$ , respectively.

|           |                                                                                     |                                                                                     |                                                                                     |                                                                                      |                                                                                       |                                                                                       |
|-----------|-------------------------------------------------------------------------------------|-------------------------------------------------------------------------------------|-------------------------------------------------------------------------------------|--------------------------------------------------------------------------------------|---------------------------------------------------------------------------------------|---------------------------------------------------------------------------------------|
| Structure | 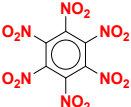   |    |    |    |    |    |
| $\rho$    | 1.942                                                                               | 1.925                                                                               | 1.923                                                                               | 1.916                                                                                | 1.910                                                                                 | 1.904                                                                                 |
| $\nu_D$   | 9266                                                                                | 8897                                                                                | 8910                                                                                | 8664                                                                                 | 8539                                                                                  | 8701                                                                                  |
| Structure |    |    |    |    |    |    |
| $\rho$    | 1.903                                                                               | 1.903                                                                               | 1.899                                                                               | 1.899                                                                                | 1.899                                                                                 | 1.897                                                                                 |
| $\nu_D$   | 8468                                                                                | 8468                                                                                | 8611                                                                                | 8415                                                                                 | 8415                                                                                  | 8704                                                                                  |
| Structure |    |    |    |    |    |    |
| $\rho$    | 1.896                                                                               | 1.896                                                                               | 1.896                                                                               | 1.896                                                                                | 1.896                                                                                 | 1.895                                                                                 |
| $\nu_D$   | 8246                                                                                | 8427                                                                                | 8427                                                                                | 8229                                                                                 | 8229                                                                                  | 8207                                                                                  |
| Structure |  |  |  |  |  |  |
| $\rho$    | 1.895                                                                               | 1.894                                                                               | 1.893                                                                               | 1.893                                                                                | 1.892                                                                                 | 1.887                                                                                 |
| $\nu_D$   | 8207                                                                                | 8072                                                                                | 8037                                                                                | 8037                                                                                 | 8048                                                                                  | 7989                                                                                  |
| Structure |  |  |  |  |  |  |
| $\rho$    | 1.886                                                                               | 1.886                                                                               | 1.885                                                                               | 1.884                                                                                | 1.884                                                                                 | 1.883                                                                                 |
| $\nu_D$   | 8210                                                                                | 8034                                                                                | 8456                                                                                | 8264                                                                                 | 8264                                                                                  | 8278                                                                                  |

**Table S6.** Top 30 Molecules by  $\nu_{DML}$ .  $\rho_{ML}$  and  $\nu_{DML}$  are in  $\text{g cm}^{-3}$  and  $\text{m s}^{-1}$ , respectively.

|           |                                                                                     |                                                                                     |                                                                                     |                                                                                      |                                                                                       |                                                                                       |
|-----------|-------------------------------------------------------------------------------------|-------------------------------------------------------------------------------------|-------------------------------------------------------------------------------------|--------------------------------------------------------------------------------------|---------------------------------------------------------------------------------------|---------------------------------------------------------------------------------------|
| Structure | 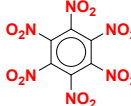 |  |  |  |  |  |
| $\nu_D$   | 9266                                                                                | 8910                                                                                | 8897                                                                                | 8889                                                                                 | 8790                                                                                  | 8723                                                                                  |
| $\rho$    | 1.942                                                                               | 1.923                                                                               | 1.925                                                                               | 1.883                                                                                | 1.874                                                                                 | 1.876                                                                                 |
| Structure |  |  |  |  |  |  |
| $\nu_D$   | 8716                                                                                | 8704                                                                                | 8701                                                                                | 8664                                                                                 | 8657                                                                                  | 8615                                                                                  |
| $\rho$    | 1.878                                                                               | 1.897                                                                               | 1.904                                                                               | 1.916                                                                                | 1.880                                                                                 | 1.867                                                                                 |

|           |                                                                                   |                                                                                   |                                                                                   |                                                                                    |                                                                                     |                                                                                     |
|-----------|-----------------------------------------------------------------------------------|-----------------------------------------------------------------------------------|-----------------------------------------------------------------------------------|------------------------------------------------------------------------------------|-------------------------------------------------------------------------------------|-------------------------------------------------------------------------------------|
| Structure |  |  |  |  |  |  |
| $v_D$     | 8611                                                                              | 8600                                                                              | 8592                                                                              | 8586                                                                               | 8571                                                                                | 8571                                                                                |
| $\rho$    | 1.899                                                                             | 1.853                                                                             | 1.876                                                                             | 1.837                                                                              | 1.834                                                                               | 1.834                                                                               |
| Structure |  |  |  |  |  |  |
| $v_D$     | 8543                                                                              | 8539                                                                              | 8530                                                                              | 8527                                                                               | 8525                                                                                | 8525                                                                                |
| $\rho$    | 1.860                                                                             | 1.910                                                                             | 1.858                                                                             | 1.849                                                                              | 1.859                                                                               | 1.859                                                                               |
| Structure |  |  |  |  |  |  |
| $v_D$     | 8524                                                                              | 8524                                                                              | 8511                                                                              | 8468                                                                               | 8468                                                                                | 8456                                                                                |
| $\rho$    | 1.864                                                                             | 1.864                                                                             | 1.845                                                                             | 1.903                                                                              | 1.903                                                                               | 1.885                                                                               |

## S7: Performance of ML in predicting BDE of C-NO<sub>2</sub> and N-NO<sub>2</sub>.

**Table S7.** Comparison of machine-learned BDE (BDE\_ML) and quantum chemistry calculated BDE (BDE\_QC) of 12 molecules with  $v_D > 7000$  m/s.

|    | $v_D$ _ML<br>(m s <sup>-1</sup> ) | BDE_ML<br>(kJ mol <sup>-1</sup> ) | BDE_QC<br>(kJ mol <sup>-1</sup> ) | Abs_BDE<br>(kJ mol <sup>-1</sup> ) | BDE_% |
|----|-----------------------------------|-----------------------------------|-----------------------------------|------------------------------------|-------|
| 1  | 7609                              | 260                               | 257                               | 3                                  | 1.2   |
| 2  | 7052                              | 264                               | 275                               | -11                                | -4.1  |
| 3  | 7704                              | 267                               | 271                               | -4                                 | -1.6  |
| 4  | 7395                              | 279                               | 273                               | 7                                  | 2.4   |
| 5  | 7154                              | 285                               | 285                               | 0                                  | -0.1  |
| 6  | 7119                              | 288                               | 297                               | -9                                 | -3.2  |
| 7  | 7028                              | 289                               | 272                               | 17                                 | 6.3   |
| 8  | 7523                              | 291                               | 286                               | 6                                  | 2.0   |
| 9  | 7271                              | 296                               | 289                               | 7                                  | 2.5   |
| 10 | 7685                              | 296                               | 300                               | -3                                 | -1.1  |
| 11 | 7207                              | 301                               | 307                               | -6                                 | -2.1  |
| 12 | 7825                              | 304                               | 301                               | 3                                  | 1.1   |

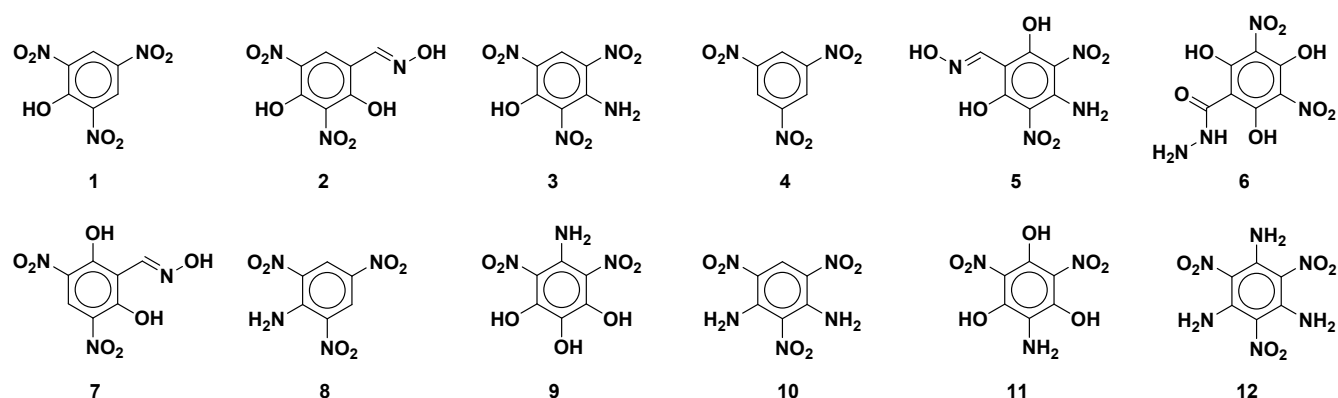

**Figure S2.** Molecular structures for BDE verification.

## S8: References

- (1) Lide, D. R., *CRC handbook of chemistry and physics: a ready-reference book of chemical and physical data*. CRC press: 1995.
- (2) Atkins, P. W.; De Paula, J.; Keeler, J., *Atkins' physical chemistry*. 2006.
- (3) Politzer, P.; Murray, J. S., Some perspectives on estimating detonation properties of C, H, N, O compounds. *Central European Journal of Energetic Materials* **2011**, 8 (3), 209-220.
- (4) Rice, B. M.; Byrd, E. F., Evaluation of electrostatic descriptors for predicting crystalline density. *Journal of computational chemistry* **2013**, 34 (25), 2146-2151.
- (5) Fei, T.; Du, Y.; Pang, S., Theoretical design and prediction of properties for dinitromethyl, fluorodinitromethyl, and

(difluoroamino)dinitromethyl derivatives of triazole and tetrazole. *RSC Advances* **2018**, 8 (19), 10215-10227.
